# Supplementary material
Source: PubMed Central journal article supplement (PMC4639448)

Figure S1

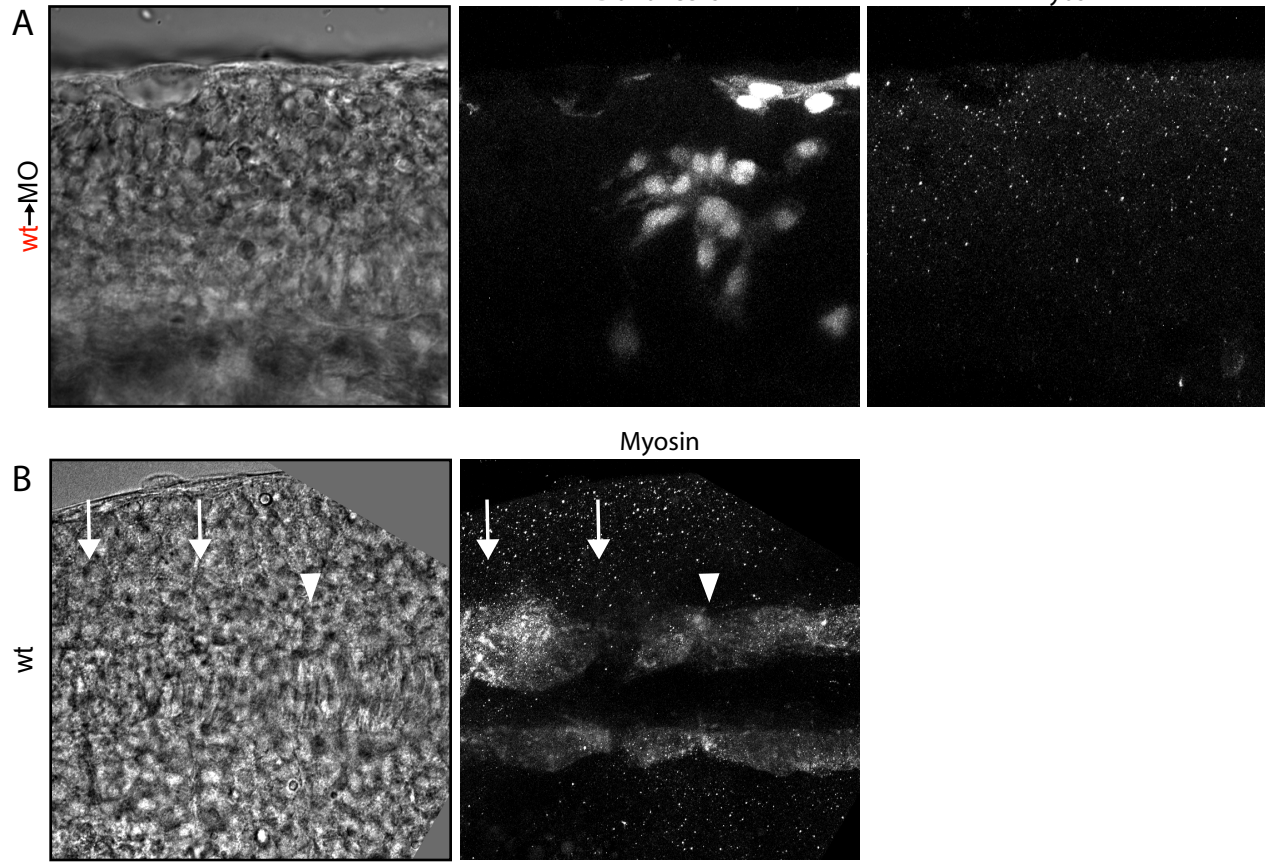

Figure S2

*Ptbx16-3.3:memRFP*

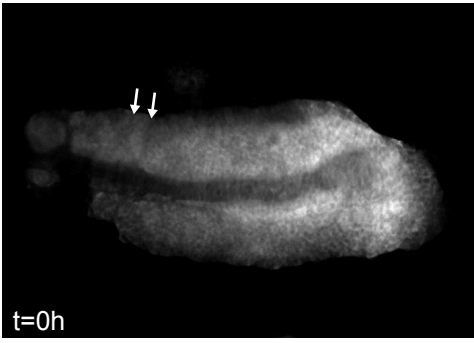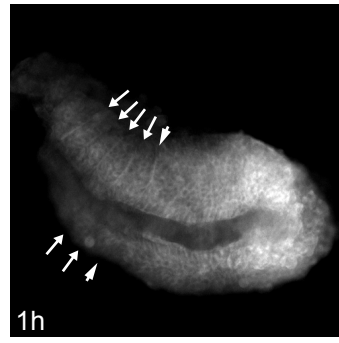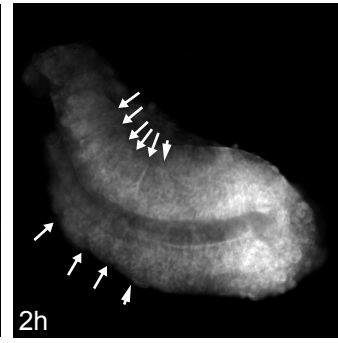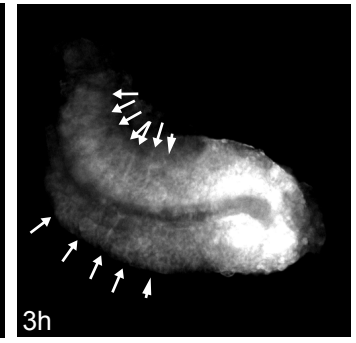

Figure S3

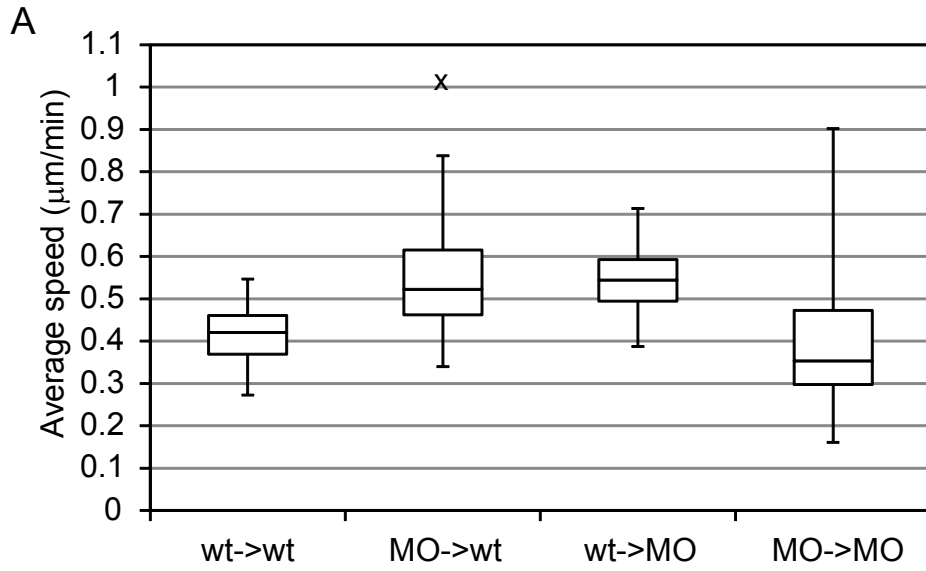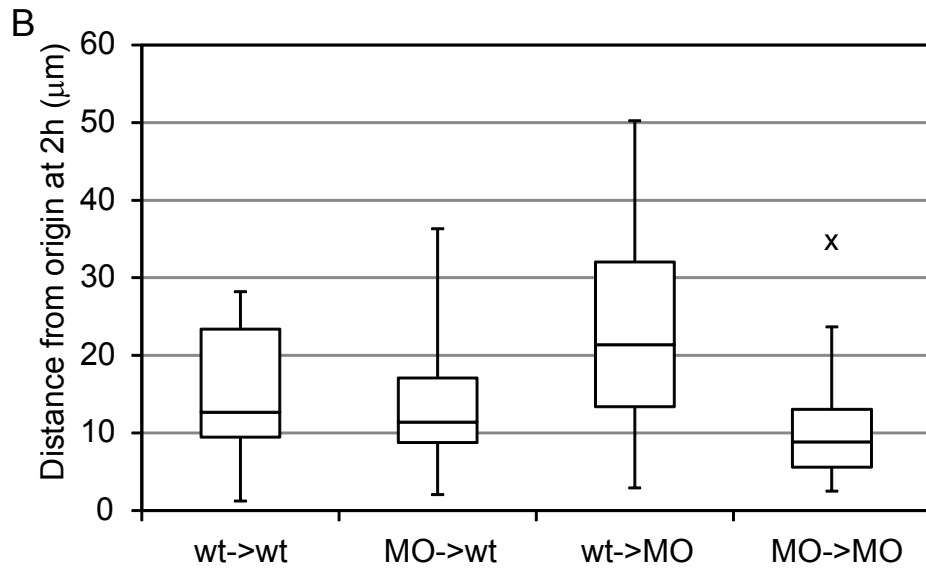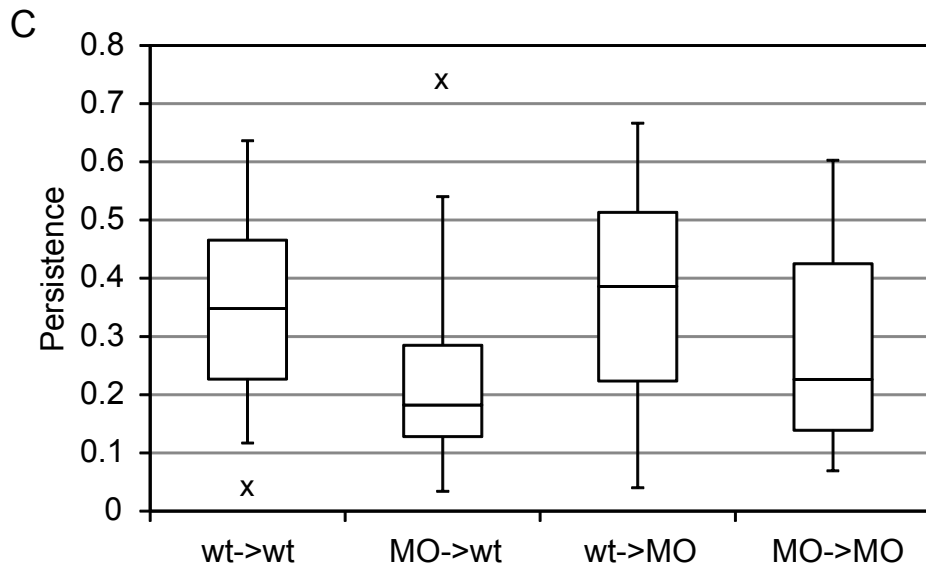

Figure S4

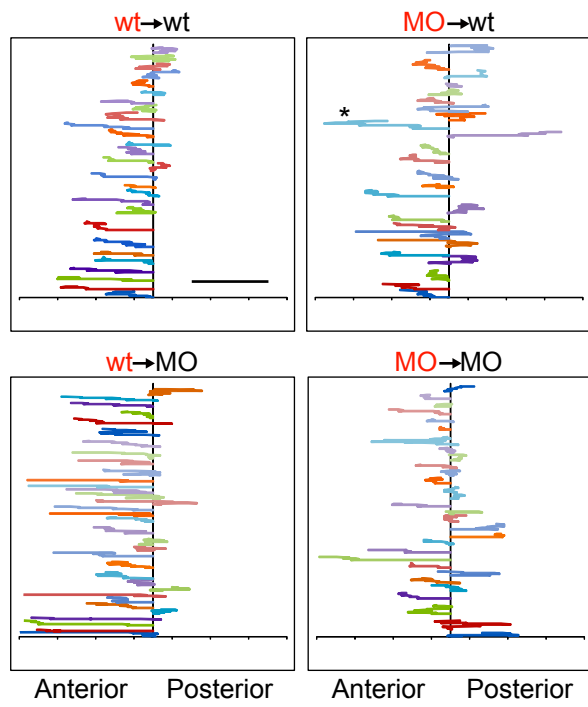

Figure S5

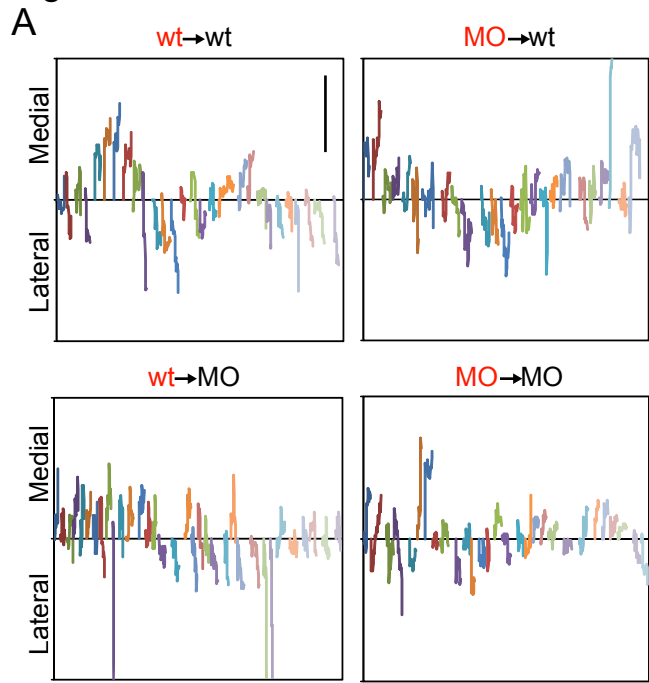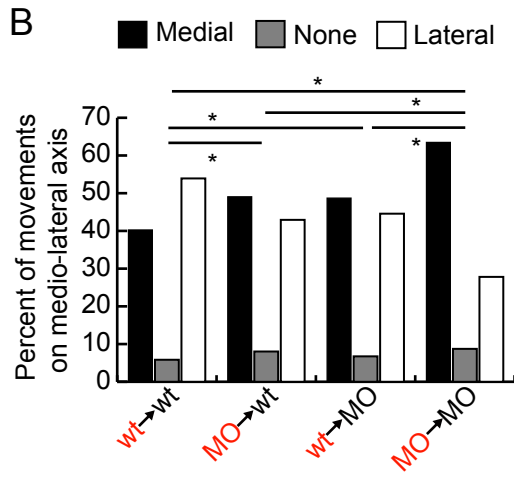

Figure S6

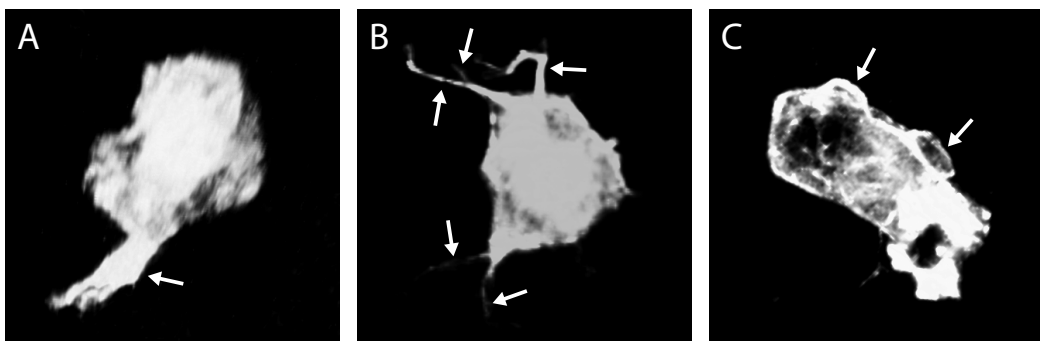

Supplement: NIHMS725394-supplement-10.pdf [file NIHMS725394-supplement-10.pdf]
